# Supplementary material
Source: publisher figshare collection journal article supplement (https://gsajournals.figshare.com/ndownloader/files/13269311)
Supplement: Supplementary file 1 [file 13269311]

**Supplementary Information**

1. **Table S1- List of yeast strains**

**The background of the haploid SK1 strains is –**

***MAT*a, *ho::Lys2, lys2, ura3, leu2::hisG, his3::hisG, trp1::hisG***

***MAT*α, *ho::Lys2, lys2, ura3, leu2::hisG, his3::hisG, trp1::hisG***

| **S. No.** | **Strain name** | **Genotype** |
| --- | --- | --- |
| 1. | SGY40 | *MAT*a/α, *ho::LYS2, lys2, ura3, leu2::hisG, his3::hisG, trp1::hisG* |
| 2. | SGY1066 | *MAT*a/α, *zip1*Δ*::loxp-URA3-loxp/ zip1*Δ*::loxp-URA3-loxp* |
| 3. | SGY223 | *MAT*a/α, *leu2::tetR-GFP::LEU2* *CEN5::TetO-HIS3/leu2::tetRGFP::LEU2 CEN5::TetO-HIS3, mam1*Δ*:: loxp-URA3-loxp/ mam1*Δ*:: loxp-URA3-loxp* |
| 4. | SGY1086 | *MAT*a/α, leu2::tetR-GFP::LEU2 *CEN5::*TetO-HIS3/leu2::tetRGFP::LEU2, *spo11*Δ:: *Loxp/ spo11*Δ:: *Loxp* |
| 5. | SGY1127 | *MAT*a/α, *leu2::tetR-GFP::LEU2 CEN5::TetO-HIS3/leu2::tetRGFP::LEU2 CEN5::TetO-HIS3, zip1*Δ*:: loxp-URA3-loxp/ zip1*Δ*:: loxp-URA3-loxp* |
| 6. | SGY116 | *MAT*a/α, *leu2::tetR-GFP::LEU2 CEN5::TetO-HIS3/leu2::tetRGFP::LEU2 CEN5::TetO-HIS3* |
| 7. | SGY3178 | *MAT*a/α, *leu2::tetR-GFP::LEU2 CEN5::TetO-HIS3/leu2::tetRGFP, spo11*Δ:: *Loxp/ spo11*Δ:: *Loxp, mam1*Δ*:: loxp-URA3-loxp/ mam1*Δ*:: loxp-URA3-loxp,cdc20::*P*CLB2-CDC20::KanMx/ cdc20::*P*CLB2-CDC20::KanMx* |
| 8. | SGY3179 | *MAT*a/α, *leu2::tetR-GFP::LEU2 CEN5::TetO-HIS3/leu2::tetRGFP, spo11*Δ:: *Loxp/ spo11*Δ:: *Loxp, zip1*Δ*:: loxp-URA3-loxp/ zip1*Δ*:: loxp-URA3-loxp cdc20::*P*CLB2-CDC20::KanMx/ cdc20::*P*CLB2-CDC20::KanMx* |
| 9. | SGY3180 | *MAT*a/α, *leu2::tetR-GFP::LEU2 CEN5::TetO-HIS3/leu2::tetRGFP, spo11*Δ:: *Loxp/ spo11*Δ:: *Loxp,cdc20::*P*CLB2-CDC20::KanMx/ cdc20::*P*CLB2-CDC20::KanMx* |
| 10. | SGY115 | *MAT*a/α, *leu2::tetR-GFP::LEU2 CEN5::TetO-HIS3/leu2::tetRGFP::LEU2* |
| 11. | SGY3195 | *MAT*a/α, *leu2::tetR-GFP::LEU2 CEN5::TetO-HIS3/leu2::tetRGFP::LEU2, mam1*Δ*:: loxp-URA3-loxp/ mam1*Δ*:: loxp-URA3-loxp* |
| 12. | SGY3190 | *MAT*a/α, *leu2::tetR-GFP::LEU2 CEN5::TetO-HIS3/leu2::tetRGFP::LEU2, mam1*Δ*:: loxp-KanMx-loxp/ mam1*Δ*:: loxp-KanMx-loxp zip1*Δ*:: loxp-URA3-loxp/ zip1*Δ*:: loxp-URA3-loxp* |
| 13. | SGY1427 | *MAT*a/α, *leu2::tetR-GFP::LEU2 CEN5::TetO-HIS3/leu2::tetRGFP::LEU2, zip1*Δ*:: loxp-URA3-loxp/ zip1*Δ*:: loxp-URA3-loxp* |
| 14. | SGY1265 | *MAT*a/α, *leu2::tetR-GFP::LEU2 CEN5::TetO-HIS3/leu2::tetRGFP::LEU2, mad2*Δ*:: KanMx/ mad2*Δ*:: KanMx* |
| 15. | SGY1267 | *MAT*a/α, *leu2::tetR-GFP::LEU2 CEN5::TetO-HIS3/leu2::tetRGFP::LEU2, mad2*Δ*:: KanMx/ mad2*Δ*:: KanMx, zip1*Δ*:: loxp-URA3-loxp/ zip1*Δ*:: loxp-URA3-loxp* |
| 16. | SGY1444 | *MAT*a/α, *cdc20::*P*CLB2-CDC20::KanMx/ cdc20::*P*CLB2-CDC20::KanMx, NDC10-6HA::HIS3/ NDC10-6HA::HIS3, MAM1-9MYC::TRP1/ MAM1-9MYC::TRP1* |
| 17. | SGY1410 | *MAT*a/α, *zip1*Δ*:: loxp-URA3-loxp/ zip1*Δ*:: loxp-URA3-loxp, cdc20::*P*CLB2-CDC20::KanMx/ cdc20::*P*CLB2-CDC20::KanMx, NDC10-6HA::HIS3/ NDC10-6HA::HIS3, MAM1-9MYC::TRP1/ MAM1-9MYC::TRP1* |
| 18 | SGY3234 | *MAT*a/α, *cdc20::*P*CLB2-CDC20::KanMx/ cdc20::*P*CLB2-CDC20::KanMx* |

1. **Table S2- The list of primers used in ChIP-qPCR**

| **Locus Name** | **Forward Primer (5` to 3`)** | **Reverse Primer (5` to 3`)** | **Chromosome No.** |
| --- | --- | --- | --- |
| ***CEN3*** | gatcagcgccaaacaatatgg | aacttccaccagtaaacgttt | **III** |
| ***CEN4*** | gcttgcaaaaggtcacatgc | gagcaggttttatgtttcgg | **IV** |
| ***Non CEN*** | gaaagcgaccagctagatta | caaacgctttaacacacaag | **IV** |

1. **Figure S1-
   Meiotic cell cycle progression in different strains.**

**
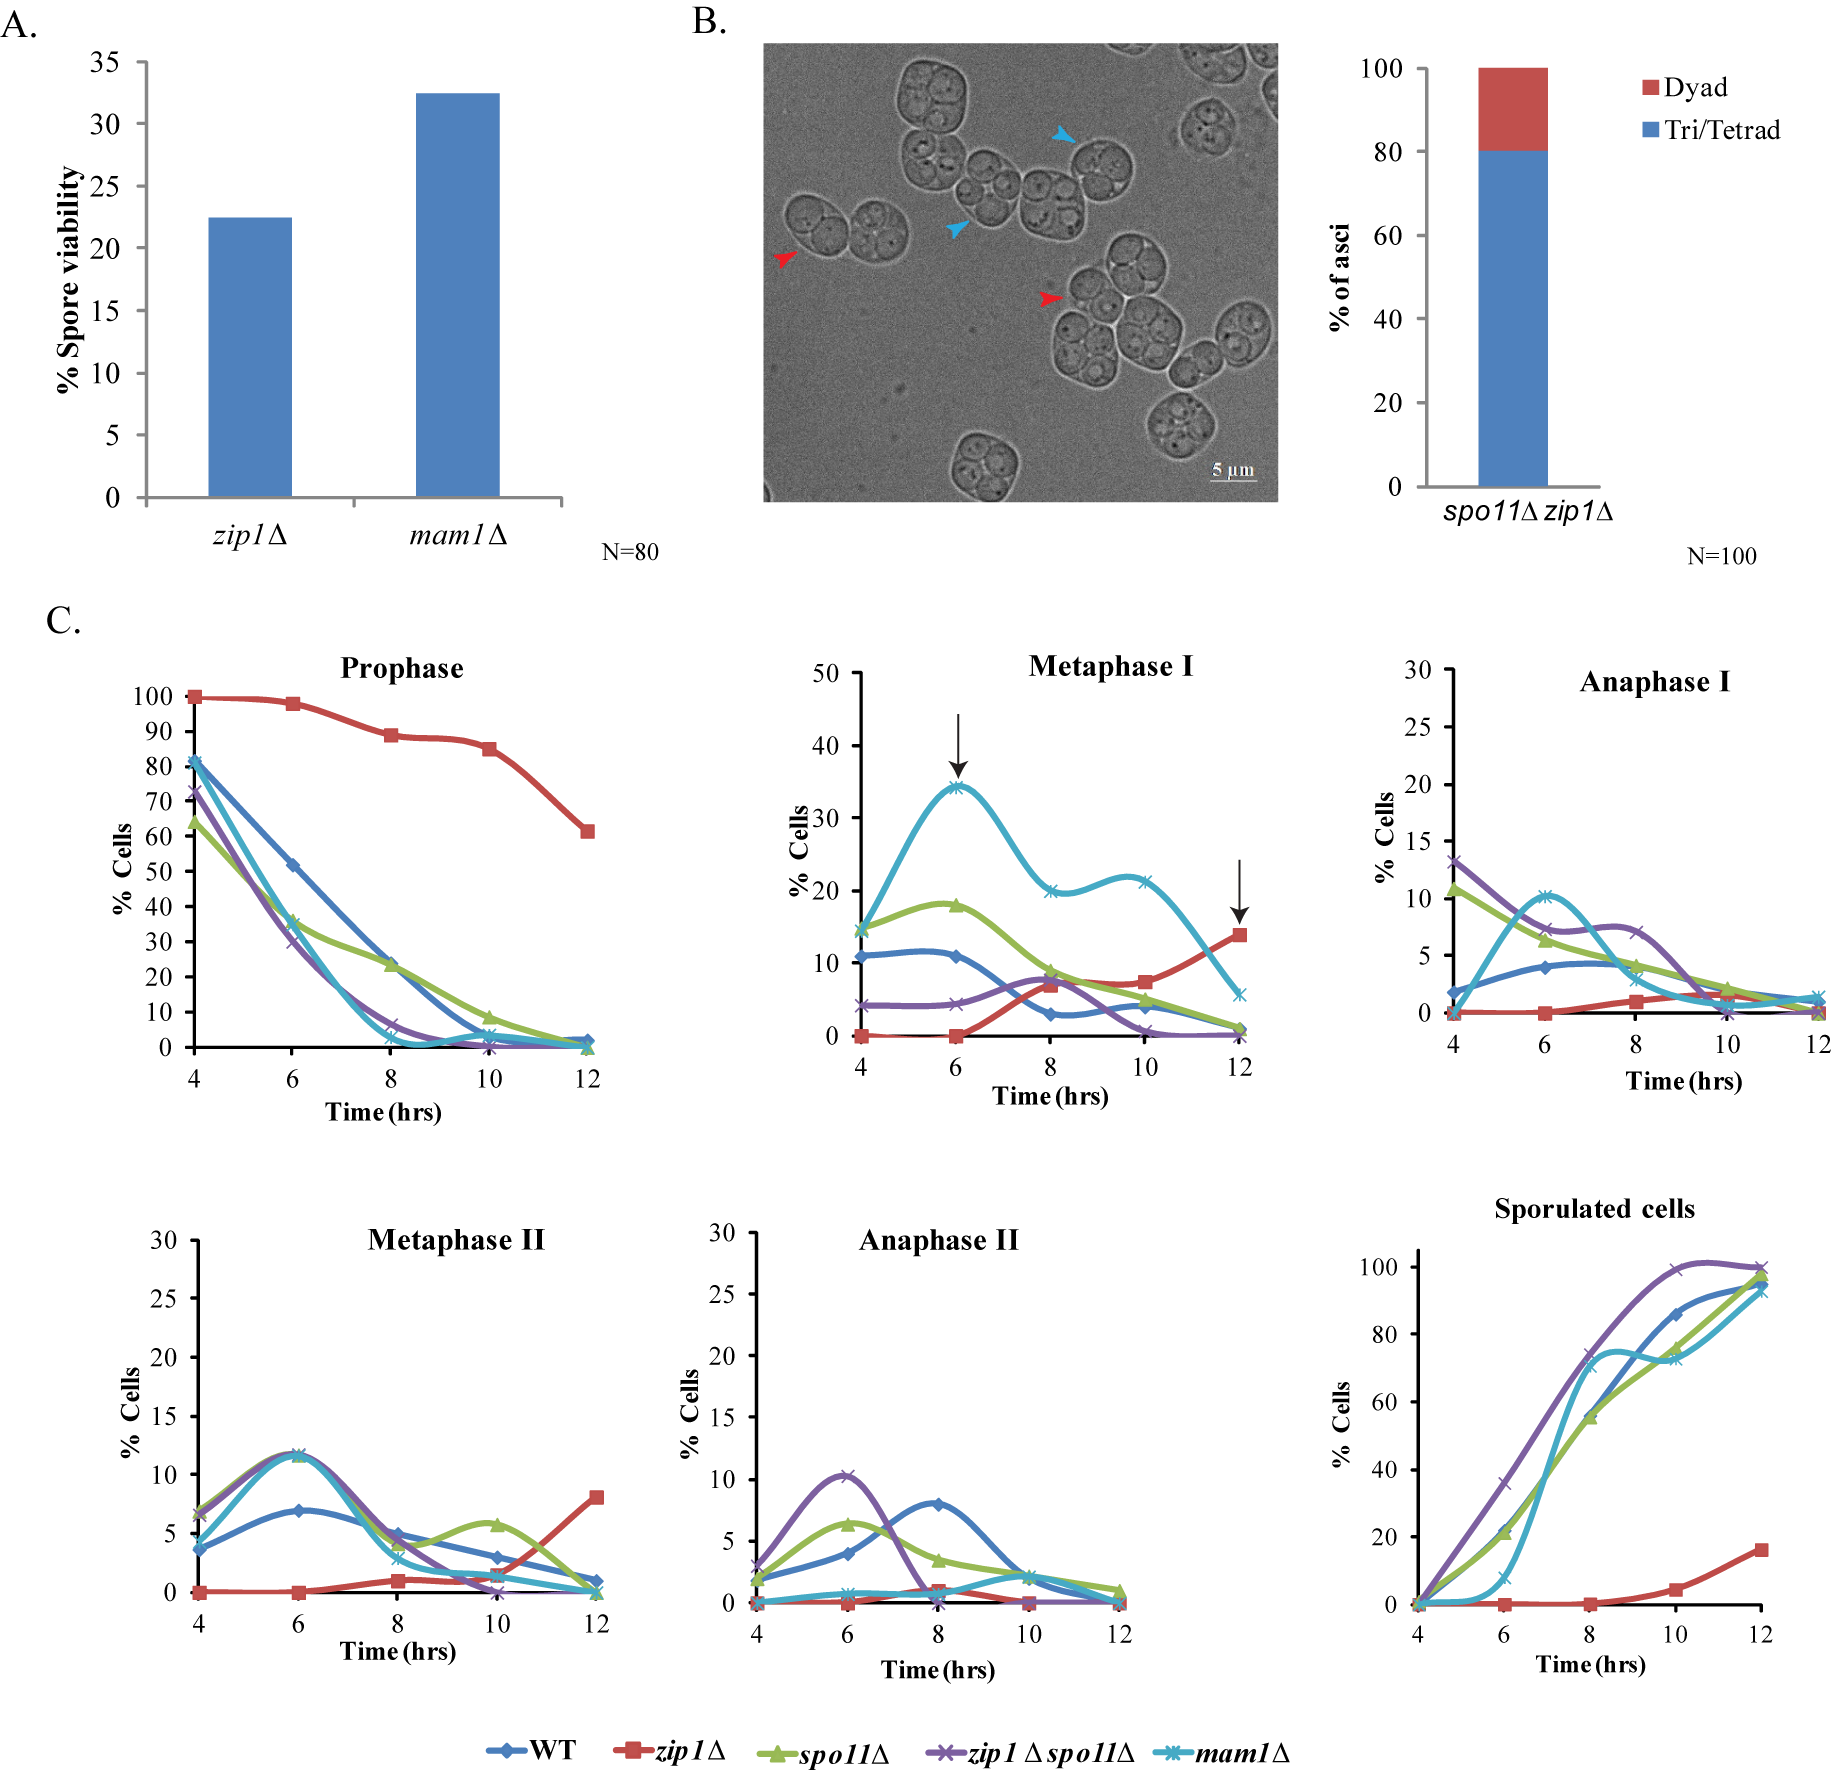
**

**Figure S1: *zip1*Δ mutant arrests primarily at meiotic prophase and secondarily at metaphase I.** (A)The spore viability was observed after dissection of 40 dyads in *zip1*Δ (SGY1127) and *mam1*Δ (SGY223) (B) The type of asci was observed for *zip1*Δ *spo11*Δ strain (SGY1068). Blue and red arrowheads show tetrad/triad and dyads, respectively. (C) The rate of progression through meiosis by the wild-type (SGY116), *zip1*Δ (SGY1127), *zip1*Δ *spo11*Δ (SGY1068) and *mam1*Δ (SGY223) cells were measured by identifying the stages of the cell cycle through the position of the spindle with respect to the nuclei. More than 100 cells were observed for each strain at each of the time points. Consistent results were obtained from two independent experiments, out of which representative data of one experiment is shown. The arrows show the metaphase I population in *mam1*Δ and *zip1*Δ strains.

**Figure S2-**


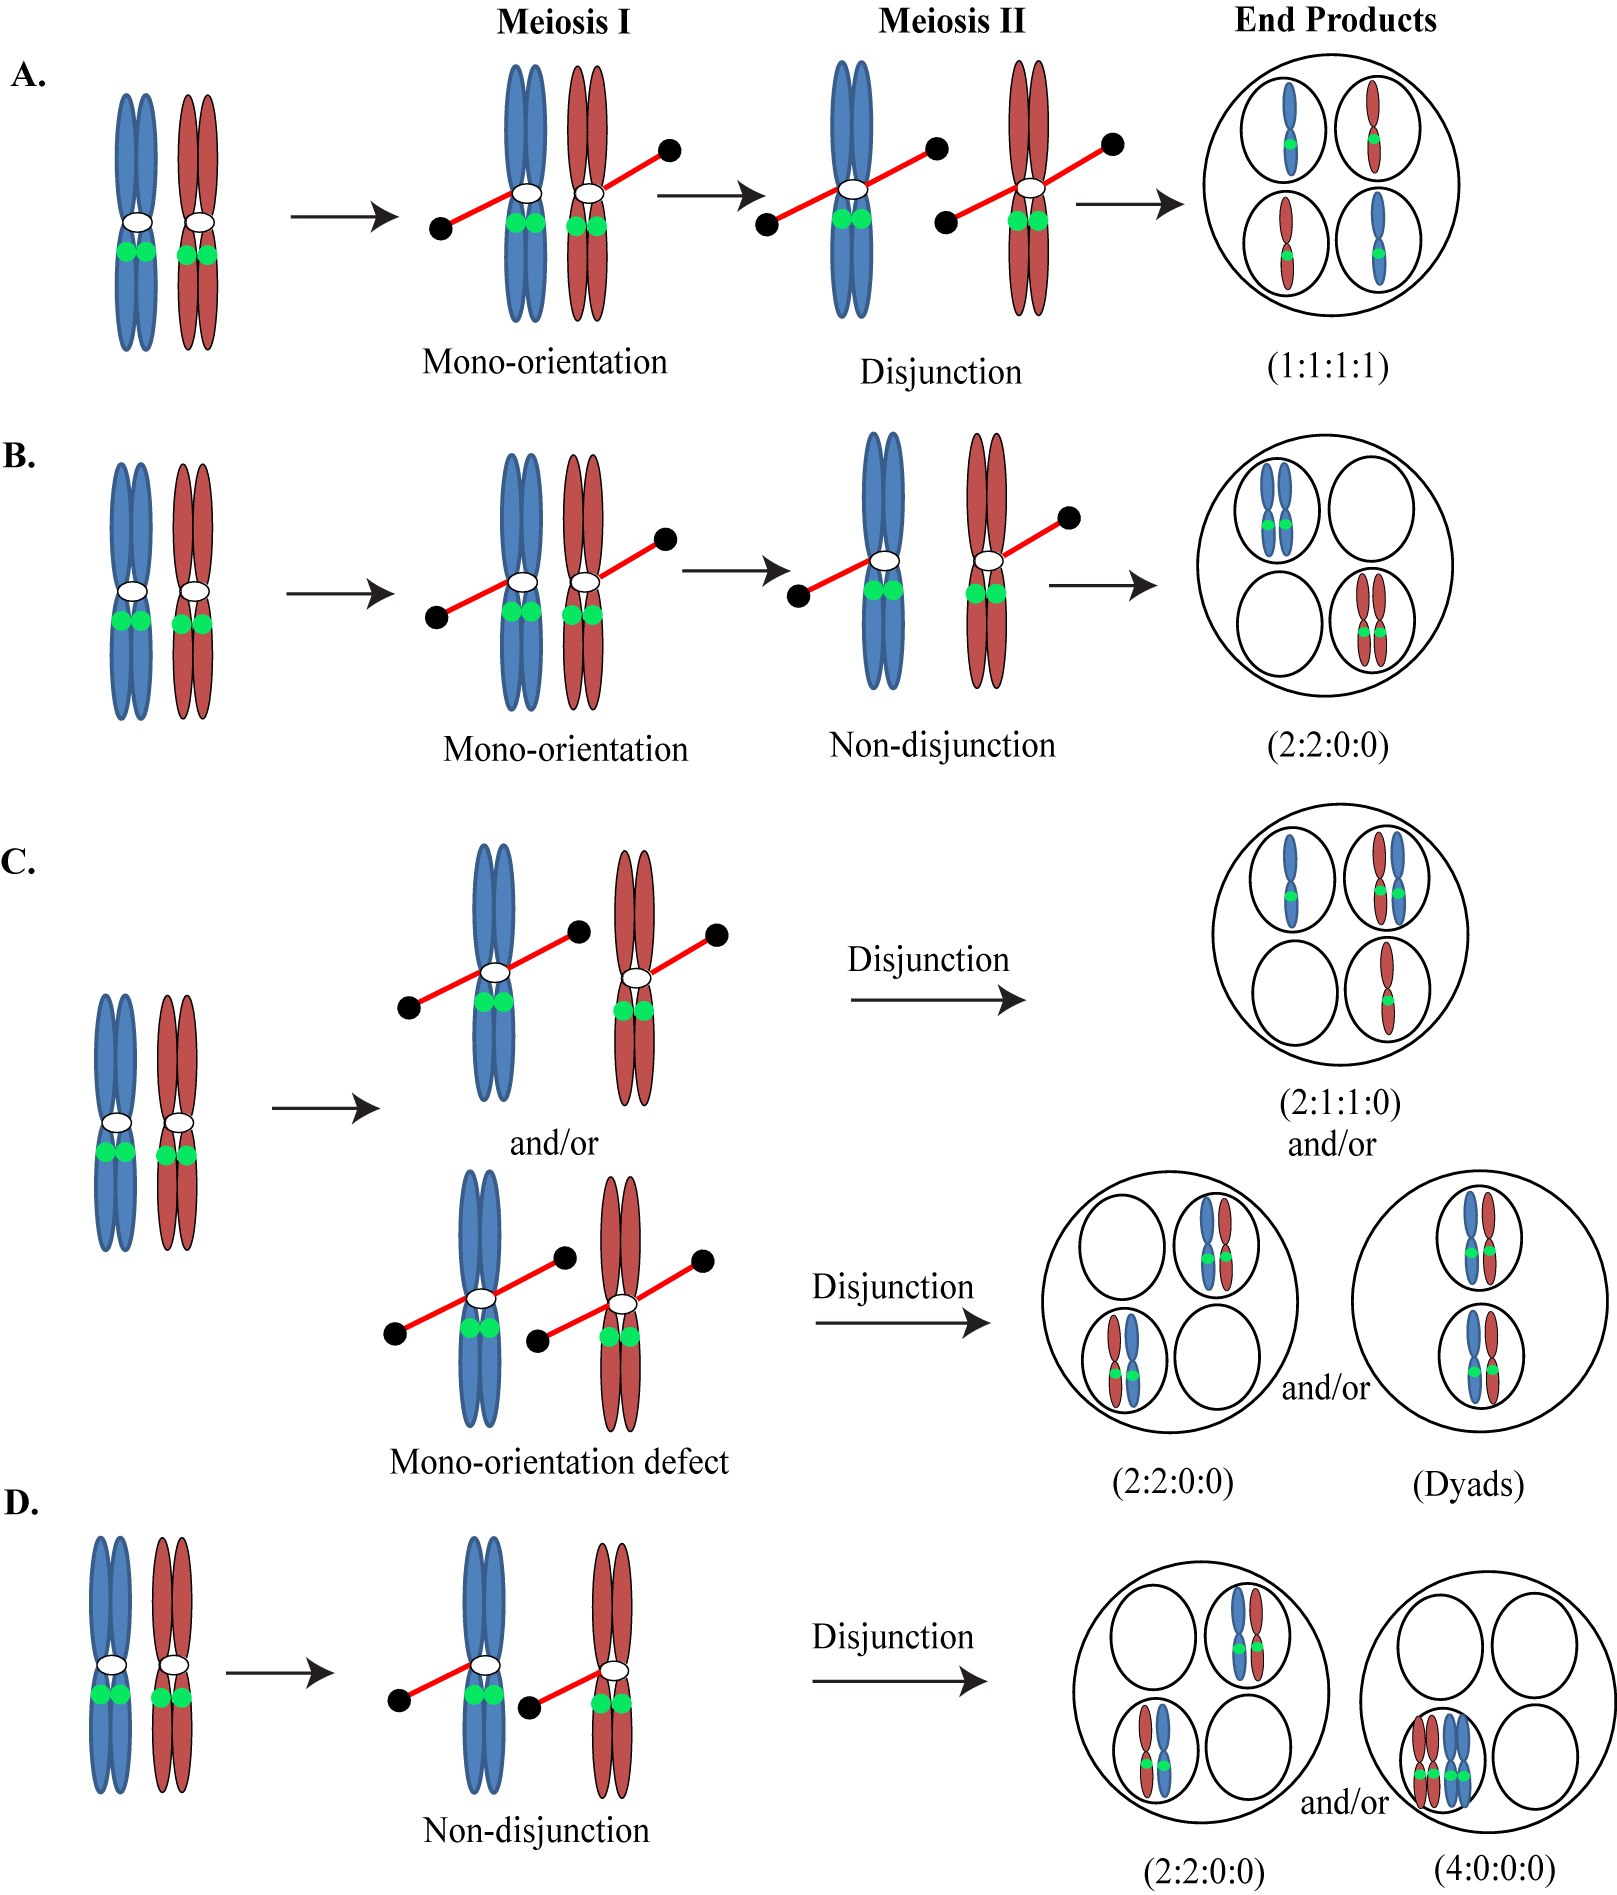


**Figure S2: Schematics of homozygous GFP marked chromosome segregation during meiosis in the wild-type and in certain defective conditions.** (A) Meiotic progression of the wild-type strain produces haploid spores after meiosis II. (B) In the case of meiosis II non-disjunction, the aneuploid spores are generated. (C) The different possible outcomes are depicted in mono-orientation defect conditions in meiosis I which produce dyads or tetrads with aneuploid spores (D) The condition shows homolog non-disjunction (due to defect in homolog pairing and/or bi-orientation) at meiosis I and possible segregation pattern of the chromosomes after meiosis II. Homolog pairing and chiasmata formation have not been depicted in the figure for simplicity.

**Figure S3-**


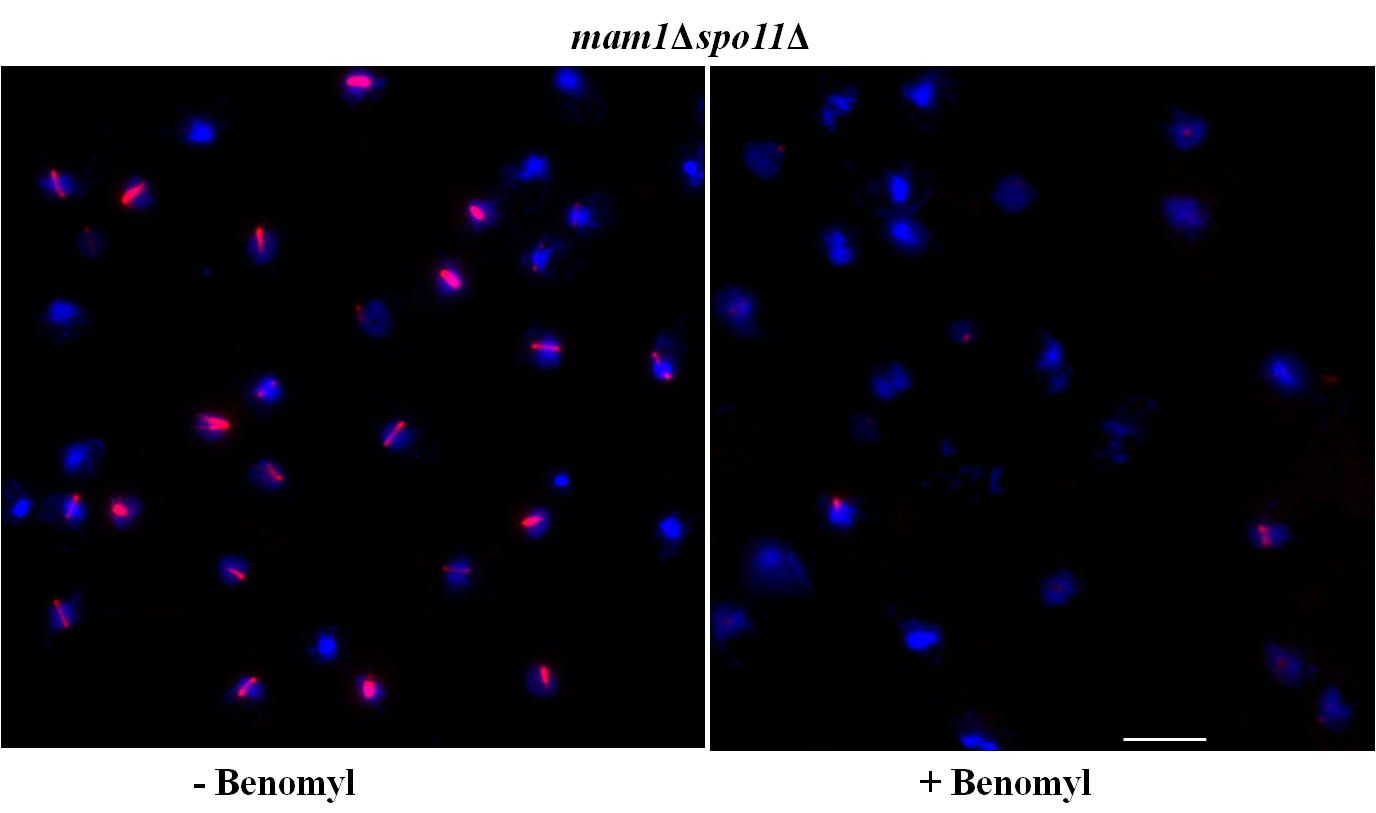


**Figure S3: Efficient microtubule depolymerization using benomyl.** *spo11*Δ, *zip1*Δ *spo11*Δ and in *mam1*Δ *spo11*Δ strains were treated with benomyl for 2 h after culturing them for 6 h in SPM**.** Here *mam1*Δ *spo11*Δ strain is shown for the reference. Bar, ~5 µm.

**Figure S4-**

**
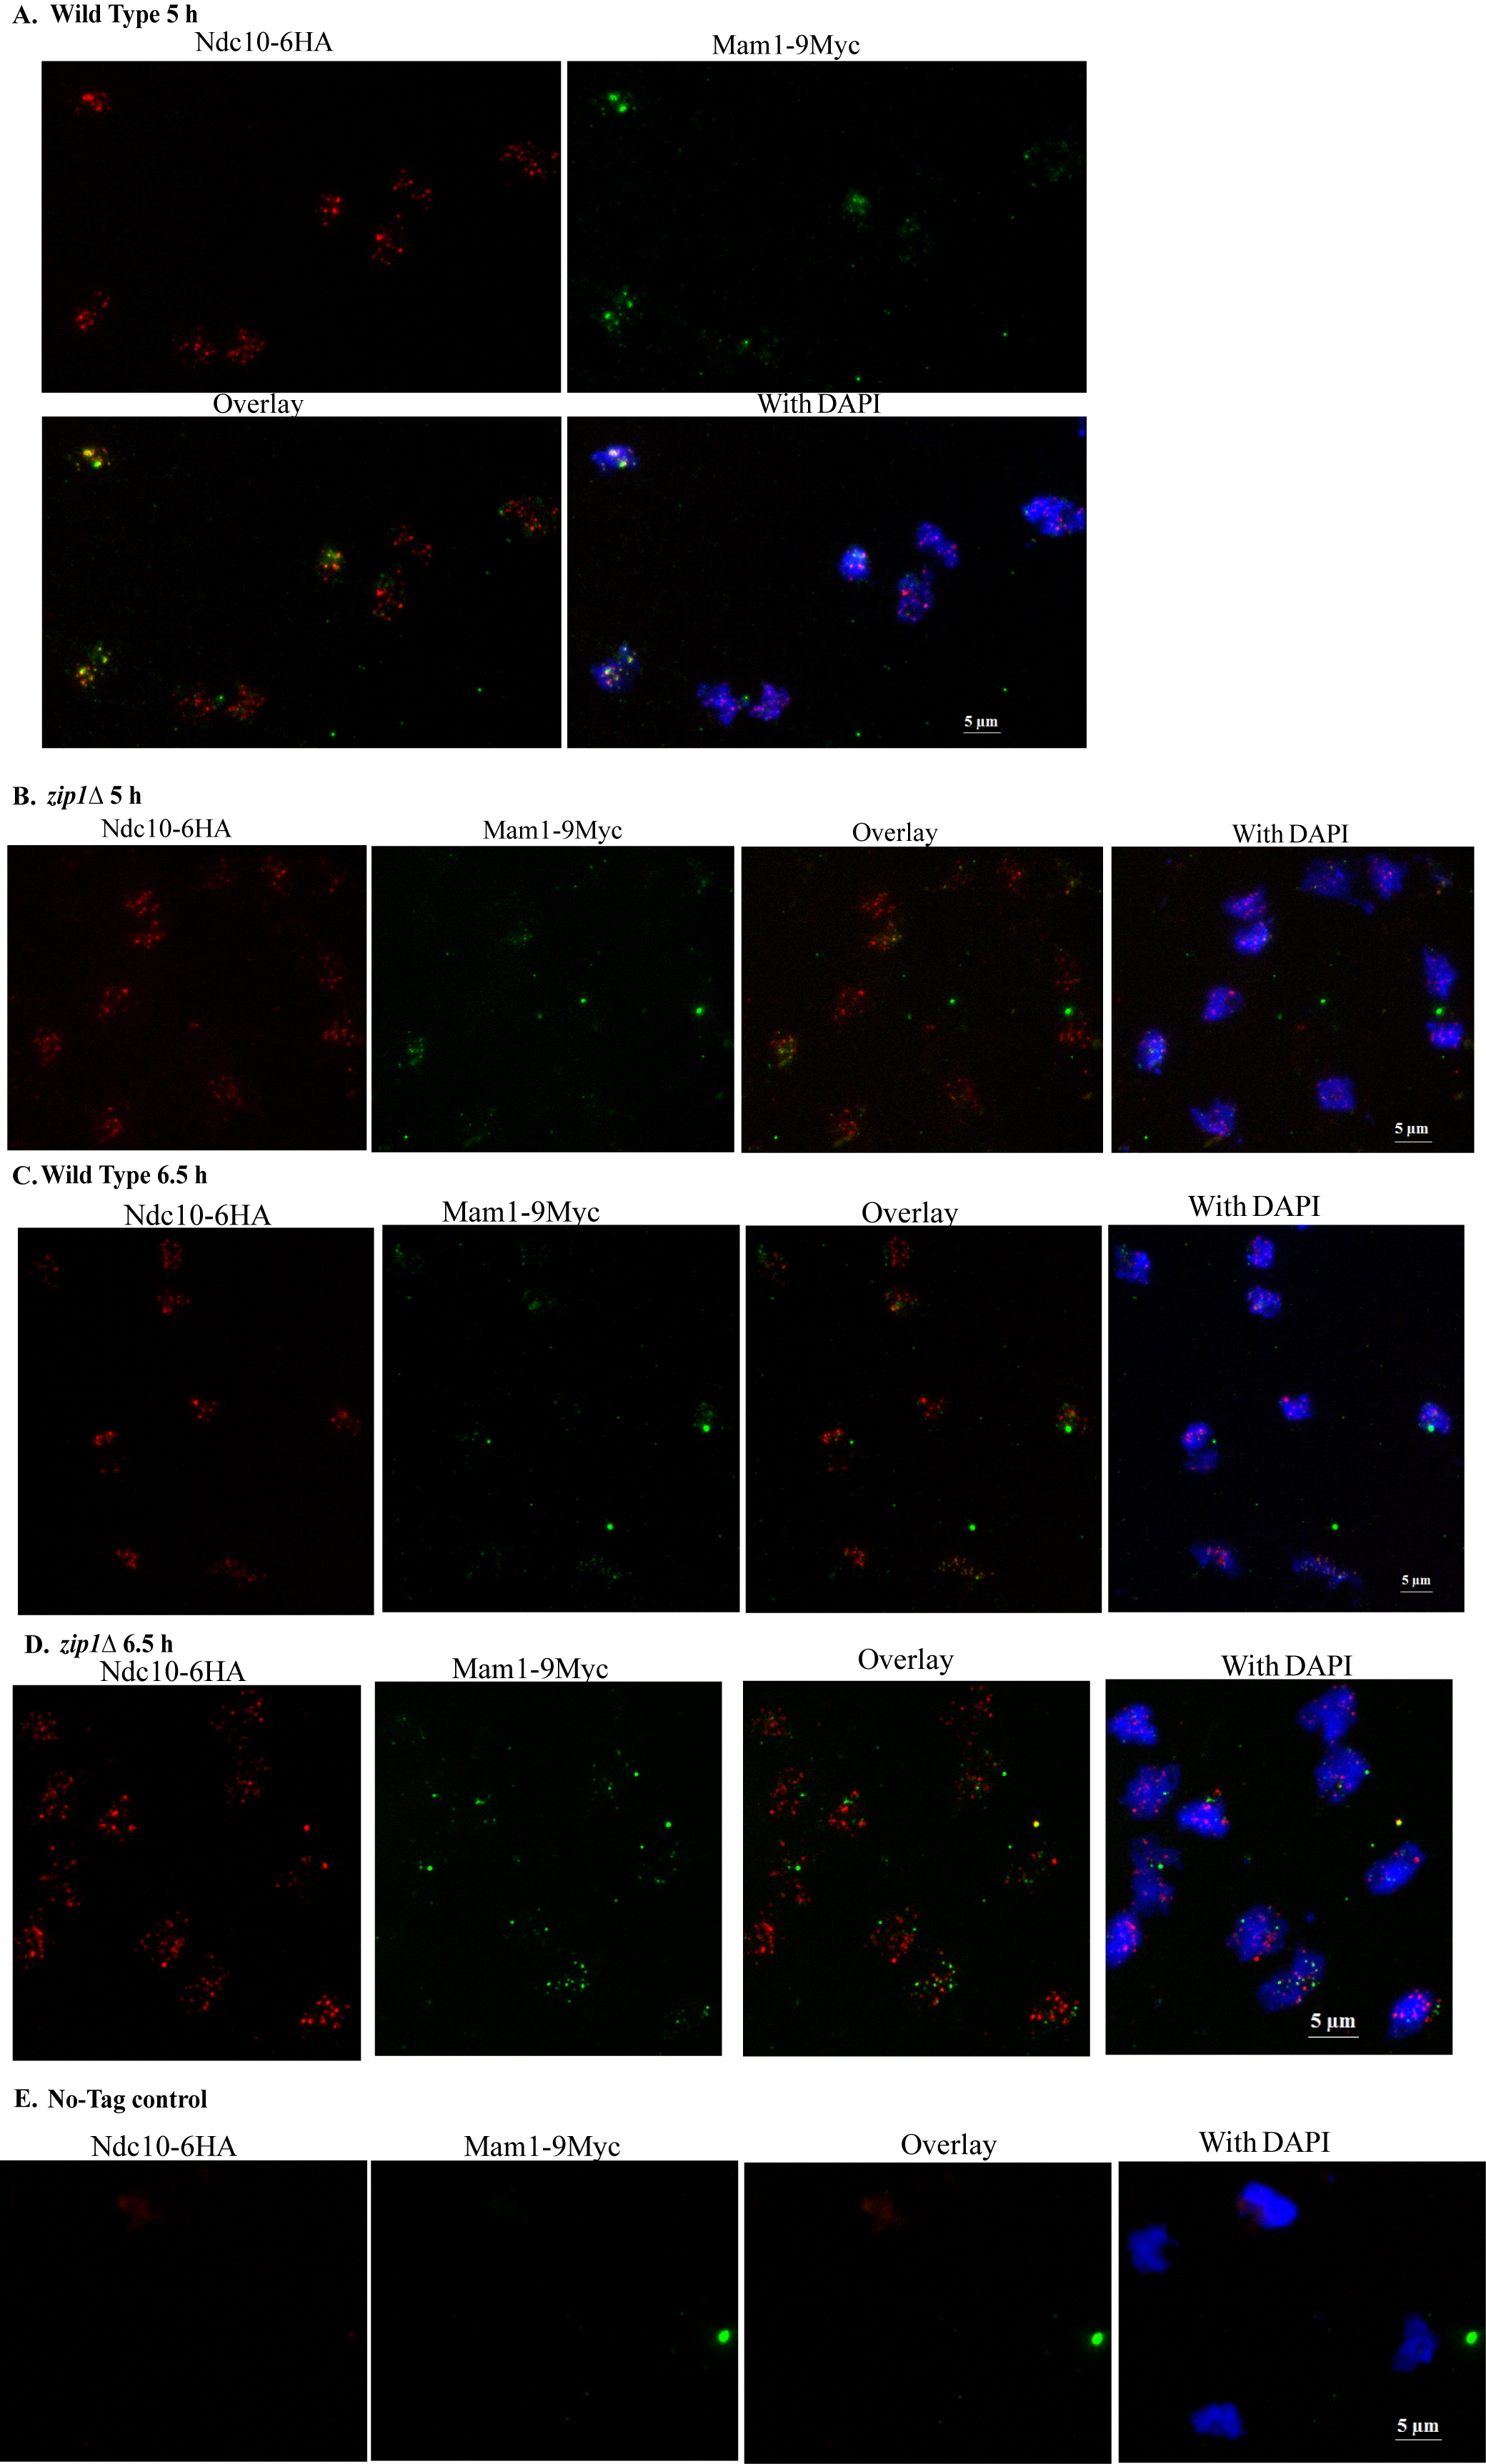
**

**Figure S4: The chromatin spreads for co-localization between Mam1 and Ndc10.** The chromatin spread for investigating the expression level of Mam1 and co-localization between Mam1-9Myc and Ndc10-6HA at 5 h in (A) wild-type or in (B) *zip1*Δ and at 6.5 h in (C) wild-type or in (D) *zip1*Δ. Chromatin spread in no-tag control strain (SGY3234) to examine any background signal due to the use of the antibodies. Bar, ~5 µm.

**Figure S5-**


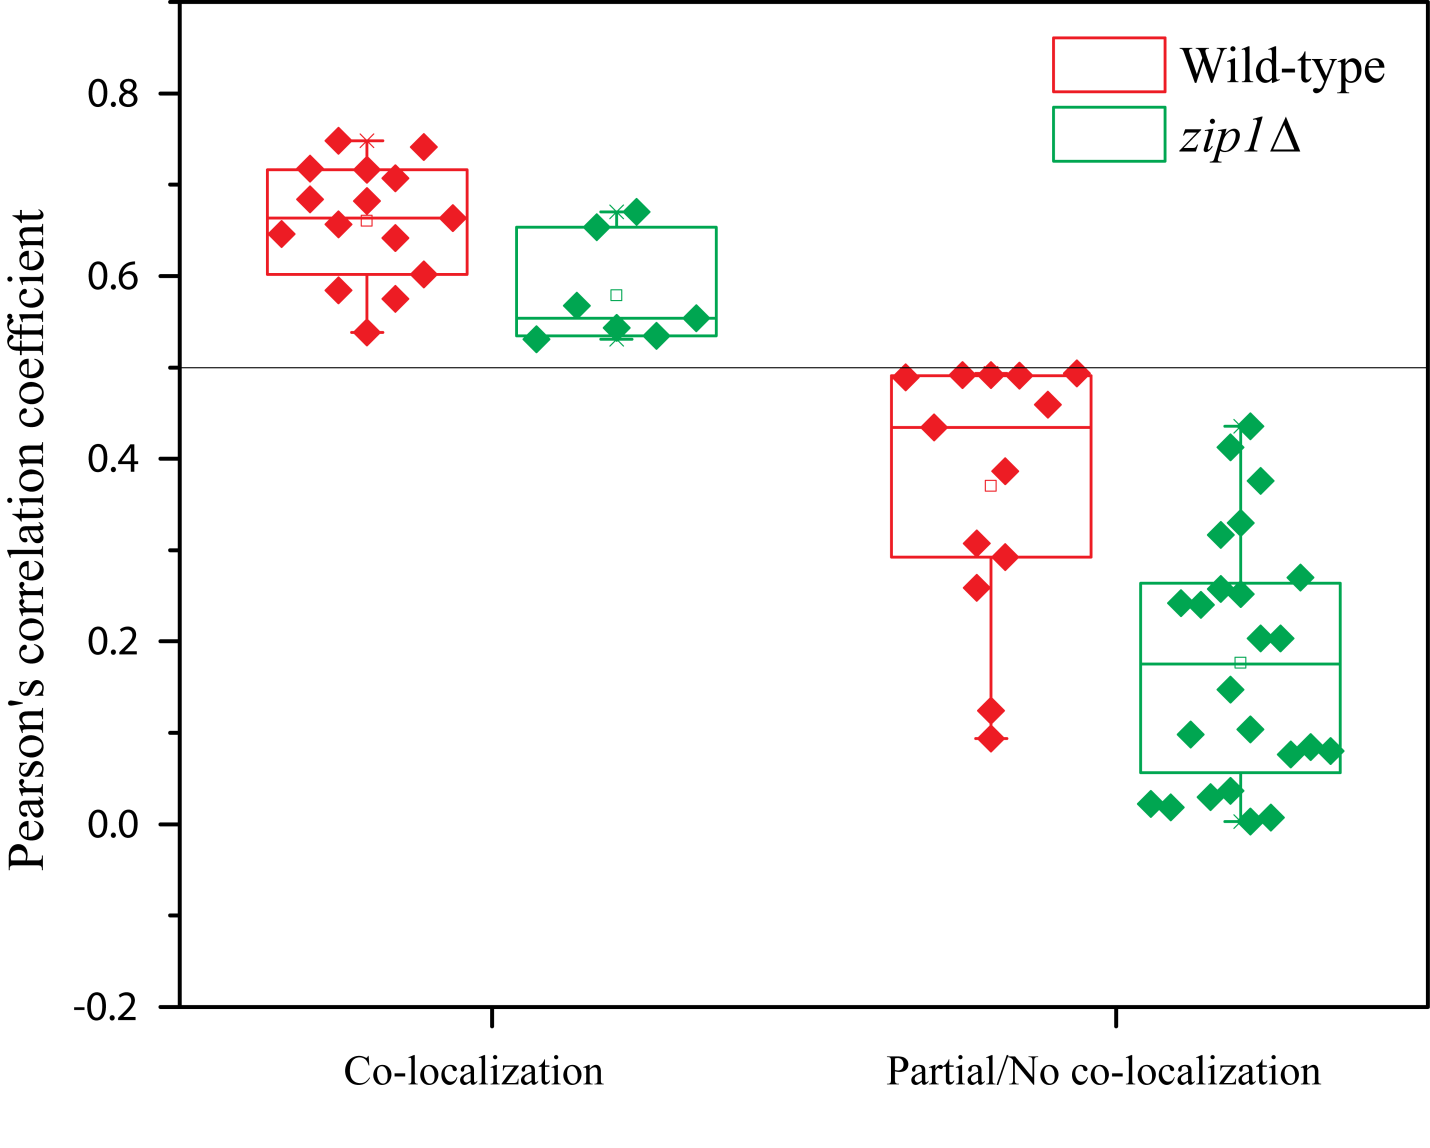


**Figure S5:** A**bsence of Zip1 causes perturbation in the frequency of co-localization between Mam1-9Myc and Ndc10-6HA.** The Pearson’s correlation coefficient was measured for around 35 chromatin spreads for each strain using ‘coloc’ tool of Imaris software. The values for all the spreads were plotted for the wild-type and *zip1*Δ. The line shows the threshold value (0.5) above which the values were considered as significant co-localization and less than it was considered as partial or no co-localization.
